# Supplementary figures and images for: Fundamental studies on the ablation behaviour of carbon in LA-ICP-MS with respect to the suitability as internal standard
Source: Royal Society of Chemistry journal article supplement (doi:10.1039/c2ja30072a), 2012-01-01

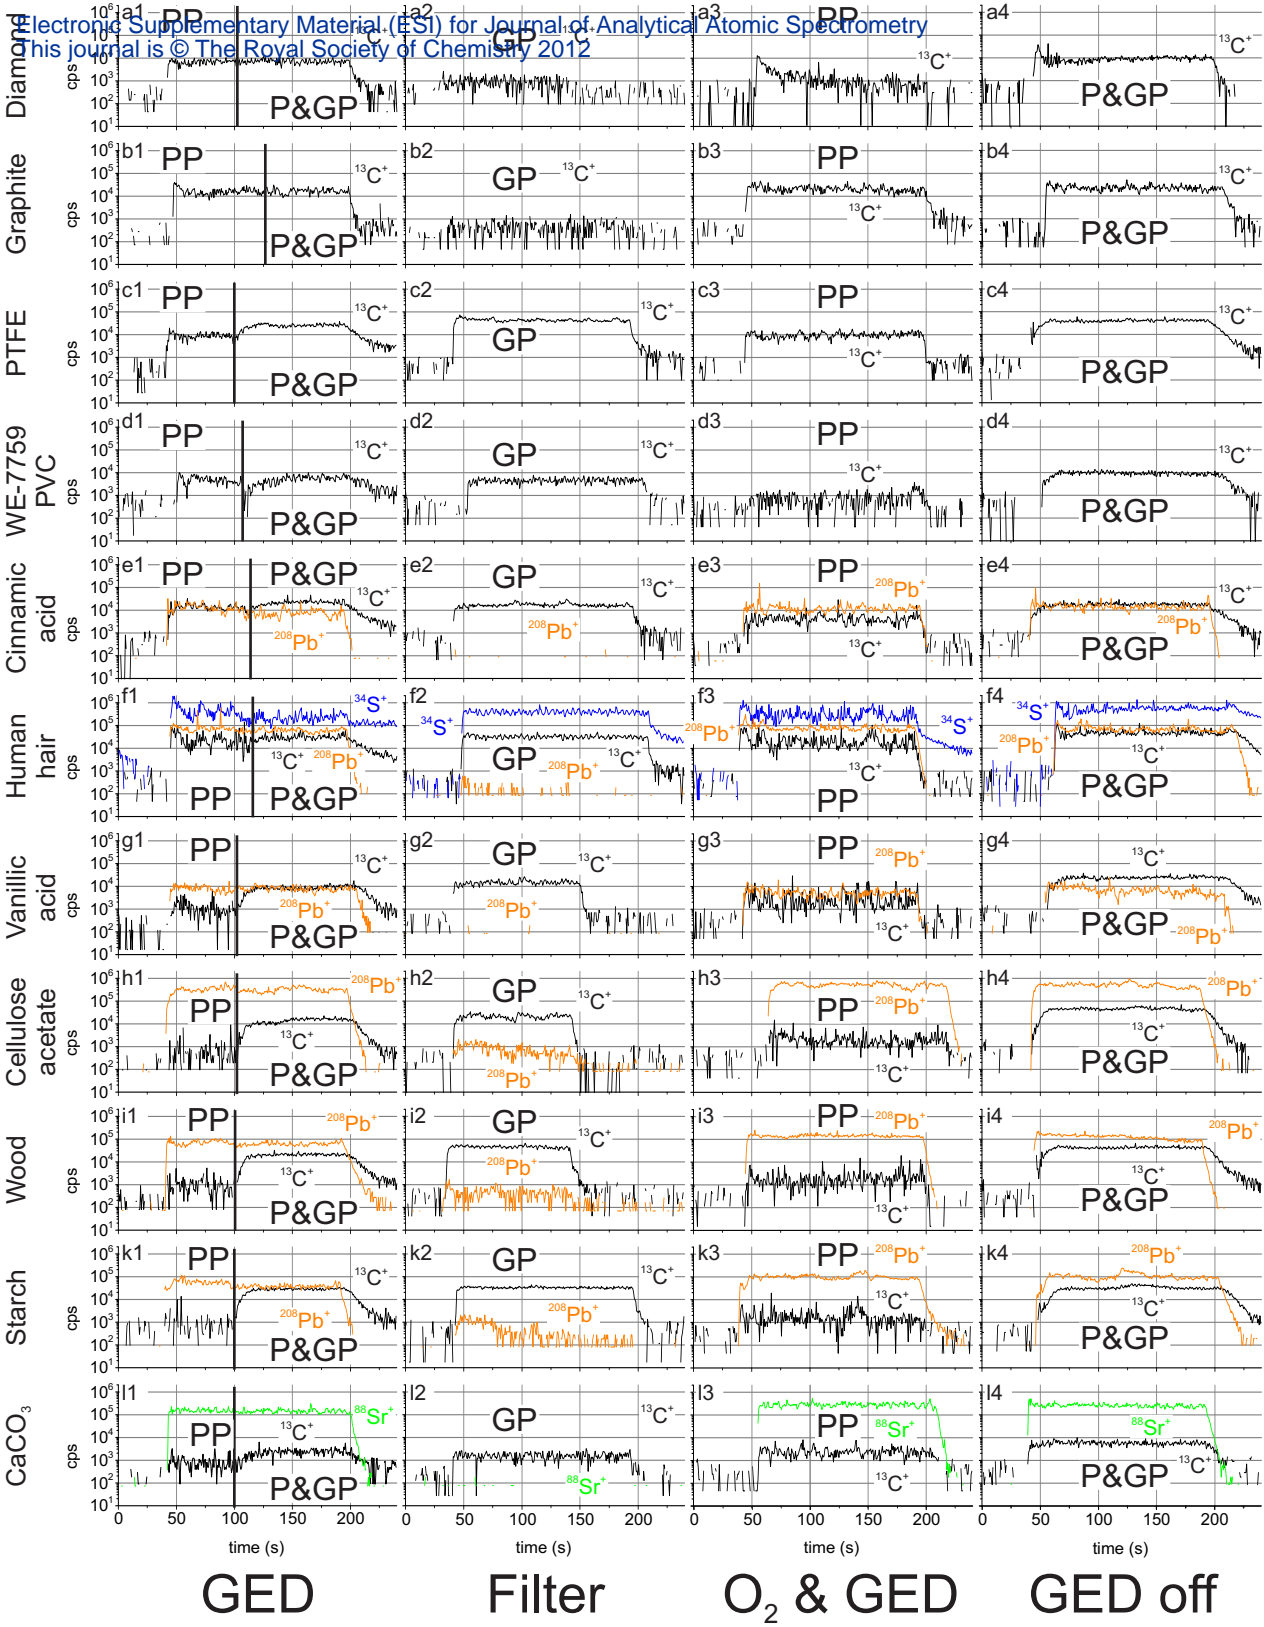

Supplement: c2ja30072a.pdf [file c2ja30072a.pdf]
